# Supplementary material for: FL118, acting as a ‘molecular glue degrader’, binds to dephosphorylates and degrades the oncoprotein DDX5 (p68) to control c‐Myc, survivin and mutant Kras against colorectal and pancreatic cancer with high efficacy
Source: PubMed Central journal article supplement (PMC9126027; doi:10.1002/ctm2.881), 2022-05-23
Supplement: CTM2-12-e881-s001.pdf [file CTM2-12-e881-s001.pdf]

## Supplemental materials

### **FL118 as a ‘molecular glue degrader’ binds to, dephosphorylates and degrades the oncoprotein DDX5 (p68) to control c-Myc, survivin and mutant Kras against colorectal and pancreatic cancer with high efficacy**

Xiang Ling <sup>1,2†\*</sup>, Wenjie Wu <sup>1,2†</sup>, Ieman A. M. Aljahdali <sup>1,3</sup>, Jianqun Liao<sup>2</sup>, Sreevidya Santha<sup>2</sup>, Christos Fountzilias <sup>4,5</sup>, Patrick M Boland <sup>4‡</sup> and Fengzhi Li <sup>1,5\*</sup>

\*Corresponding authors. E-mail: [fengzhi.li@roswellpark.org](mailto:fengzhi.li@roswellpark.org) and [Xiang.Ling@RoswellPark.org](mailto:Xiang.Ling@RoswellPark.org)

### **Supplemental Text Methods**

#### **Replacement of the Tris-HCl buffer with the PBS buffer for purified proteins for drug-protein binding analyses using isothermal titration calorimetry (ITC)**

After the purified proteins were eluted from the agarose resin with 3X flag peptide, the same purified protein samples from different batches were combined. Then, the DDX5 or Top1 proteins in the 1X wash buffer (50mM Tris-HCl, 150mM NaCl, pH7.4) containing Flag peptide were replaced by using 1.5 mL size Nanosep 10K Omega device (PALL Life Sciences). Briefly, 200-300  $\mu$ L purified proteins with a concentration of 1-2  $\mu$ g/ $\mu$ L were pipetted into the sample reservoir of the Nanosep device and centrifuged at 8000 RPM for 15-20 min to remove the 1X wash buffer with Flag peptides (removing the flow-out after each time centrifugation). Then, the retained proteins were washed with 300-400  $\mu$ L 1X phosphate-buffered saline (PBS) (137 mM NaCl, 10 mM Phosphate, 2.7 mM KCl at pH7.4) 4 times by centrifugation as above. The PBS-washed proteins were then resuspended in 200-300  $\mu$ L 1X PBS (pH7.4) depending on the initial protein concentration. The PBS-resuspended protein samples were recovered from the reservoir and the protein concentrations were determined using the nano-drop reader (Bio-Rad) and BCA Protein Assay (Thermo/Pierce) for double-making sure the concentration. This buffer replacement is important for the next step of the isothermal titration calorimetry (ITC) to analyze FL118 binding affinity to the proteins.

#### **Methods to determine the minimal DMSO concentration required for FL118 at 100 $\mu$ M without precipitation to match the requirement for FL118-protein binding analysis by ITC**

This includes several steps. **(1) Preparation of required materials and reagents:** (a) 1x PBS (137 mM NaCl, 10 mM Phosphate, 2.7 mM KCl at pH7.4); (b) 2 mM cold FL118 in DMSO (cold FL118, 1.1mg +1,403  $\mu$ L DMSO); and (c) <sup>3</sup>H-FL118 stock (the dry <sup>3</sup>H-FL118 ,5.6 Ci/mmol, was

dissolved in 446  $\mu\text{L}$  DMSO to make a solution of 11.2 mCi/ml, which has the  $^3\text{H}$ -FL118 concentration of 11.2 mCi/ml / 5.6 Ci/mmol  $\times$  1000 = 2000  $\mu\text{M}$ /2 mM). **(2)** Prepared a FL118 (cold) and  $^3\text{H}$ -FL118 mix with the ratio of 9:1 at 2 mM level for the final concentration of FL118/ $^3\text{H}$ -FL118 at 100  $\mu\text{M}$  with 5% DMSO: 225  $\mu\text{L}$  2 mM cold FL118 were mixed with 25  $\mu\text{L}$  2 mM  $^3\text{H}$ -FL118 to make 250  $\mu\text{L}$  (2 mM). Then, 10  $\mu\text{L}$  2 mM FL118/ $^3\text{H}$ -FL118 were added into 190  $\mu\text{L}$  1xPBS to make 200  $\mu\text{L}$  to make FL118 at 100  $\mu\text{M}$  containing 5% DMSO. Of note, took out 20  $\mu\text{L}$  before centrifuge as pre-Spin control. **(3)** Prepared a FL118 and  $^3\text{H}$ -FL118 mix with the ratio of 9:1 at 1.25 mM level for the final concentration of FL118/ $^3\text{H}$ -FL118 at 100  $\mu\text{M}$  containing 8% DMSO: Took 62.5  $\mu\text{L}$  (2 mM FL118/ $^3\text{H}$ -FL118 mix) + 37.5  $\mu\text{L}$  DMSO to make 100  $\mu\text{L}$  (FL118, 1.25 mM). Then, added 16  $\mu\text{L}$  1.25 mM FL118/ $^3\text{H}$ -FL118 into 184  $\mu\text{L}$  1xPBS to make 200  $\mu\text{L}$  FL118 100  $\mu\text{M}$  containing 8% DMSO. Of note, took out 20  $\mu\text{L}$  before centrifuge as pre-Spin control. **(4)** Prepared a FL118 and  $^3\text{H}$ -FL118 mix with the ratio of 9:1 at 1 mM level for the final concentration of FL118/ $^3\text{H}$ -FL118 at 100  $\mu\text{M}$  with 10% DMSO: Took 150  $\mu\text{L}$  (2 mM FL118/ $^3\text{H}$ -FL118 mix) + 150  $\mu\text{L}$  DMSO to make 300  $\mu\text{L}$  (FL118, 1 mM). Then, added 20  $\mu\text{L}$  1 mM FL118/ $^3\text{H}$ -FL118 into 180  $\mu\text{L}$  1xPBS to make 200  $\mu\text{L}$  FL118 at 100  $\mu\text{M}$  containing 10% DMSO. Of note, took out 20  $\mu\text{L}$  before centrifuge as pre-Spin control. **(5)** Prepared a FL118 and  $^3\text{H}$ -FL118 mix with the ratio of 9:1 at 0.625 mM level for the final concentration of FL118/ $^3\text{H}$ -FL118 at 100  $\mu\text{M}$  with 16% DMSO: Took 20  $\mu\text{L}$  (1.25 mM FL118/ $^3\text{H}$ -FL118 mix) + 20  $\mu\text{L}$  DMSO to make 40  $\mu\text{L}$  (FL118, 0.625 mM). Then, added 32  $\mu\text{L}$  0.625 mM FL118/ $^3\text{H}$ -FL118 into 168  $\mu\text{L}$  1xPBS to make 200  $\mu\text{L}$  FL118 at 100  $\mu\text{M}$  containing 16% DMSO. Of note, took out 20  $\mu\text{L}$  before centrifuge as pre-Spin control. **(6)** Prepared a FL118 and  $^3\text{H}$ -FL118 mix with the ratio of 9:1 at 0.5 mM level for the final concentration of FL118/ $^3\text{H}$ -FL118 at 100  $\mu\text{M}$  with 20% DMSO: Take 150  $\mu\text{L}$  (1 mM FL118/ $^3\text{H}$ -FL118 mix) + 150  $\mu\text{L}$  DMSO to make 300  $\mu\text{L}$  (0.5 mM). Then, added 40  $\mu\text{L}$  0.5 mM FL118/ $^3\text{H}$ -FL118 into 160  $\mu\text{L}$  1xPBS to make 200  $\mu\text{L}$  FL118 at 100  $\mu\text{M}$  containing 20% DMSO. Of note, took out 20  $\mu\text{L}$  before centrifuge as pre-Spin control. **(7)** Prepared a FL118 and  $^3\text{H}$ -FL118 mix with the ratio of 9:1 at 0.4 mM level for the final concentration of FL118/ $^3\text{H}$ -FL118 at 100  $\mu\text{M}$  with 25% DMSO: Took 15  $\mu\text{L}$  (2 mM FL118/ $^3\text{H}$ -FL118 mix) + 60  $\mu\text{L}$  DMSO to make 75  $\mu\text{L}$  (0.4 mM). Then, added 50  $\mu\text{L}$  0.4 mM FL118/ $^3\text{H}$ -FL118 into 150  $\mu\text{L}$  1xPBS to make 200  $\mu\text{L}$  FL118 at 100  $\mu\text{M}$  containing 25% DMSO. Of note, took out 20  $\mu\text{L}$  before centrifuge as pre-Spin control. **(8)** Prepared a FL118 and  $^3\text{H}$ -FL118 mix with the ratio of 9:1 at 0.25 mM level for the final concentration of FL118/ $^3\text{H}$ -FL118 at 100  $\mu\text{M}$  with 40% DMSO: Took 150  $\mu\text{L}$  (0.5 mM FL118/ $^3\text{H}$ -FL118 mix) + 150  $\mu\text{L}$  DMSO to make 300  $\mu\text{L}$  (0.25 mM). Then, added 80  $\mu\text{L}$  0.25 mM FL118/ $^3\text{H}$ -FL118 into 120  $\mu\text{L}$  1xPBS to make 200  $\mu\text{L}$  FL118 at 100  $\mu\text{M}$  containing 40% DMSO. Of note, took out 20  $\mu\text{L}$  before centrifuge as pre-Spin control.

After took out 20  $\mu\text{L}$  solution from each of the above-prepared solutions as controls, then centrifuged all seven 1.5 ml tube at 3,000 rpm for 1 min, and then took out another 20  $\mu\text{L}$  supernatant from each of the seven tubes. The seven 1.5 ml tube were further centrifuged at 12,000 rpm for 1 min, and then took out another 20  $\mu\text{L}$  supernatant from each 1.5 ml tube. Each of the 20  $\mu\text{L}$  were put into a scintillation vial containing 3 ml scintillation solution for tritium counting, and the results are shown in the **Table S2**.

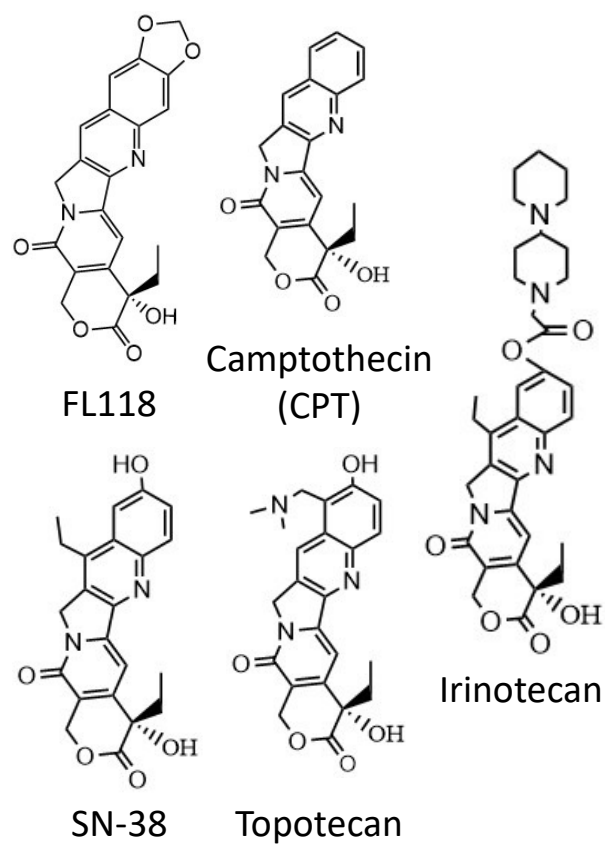

**Fig. S1.** The chemical structure of FL118, camptothecin (CPT), and CPT analogues, irinotecan (CPT-11), SN-38 (active metabolite of irinotecan) and topotecan.

### A. An example of the “Mannich Reaction”

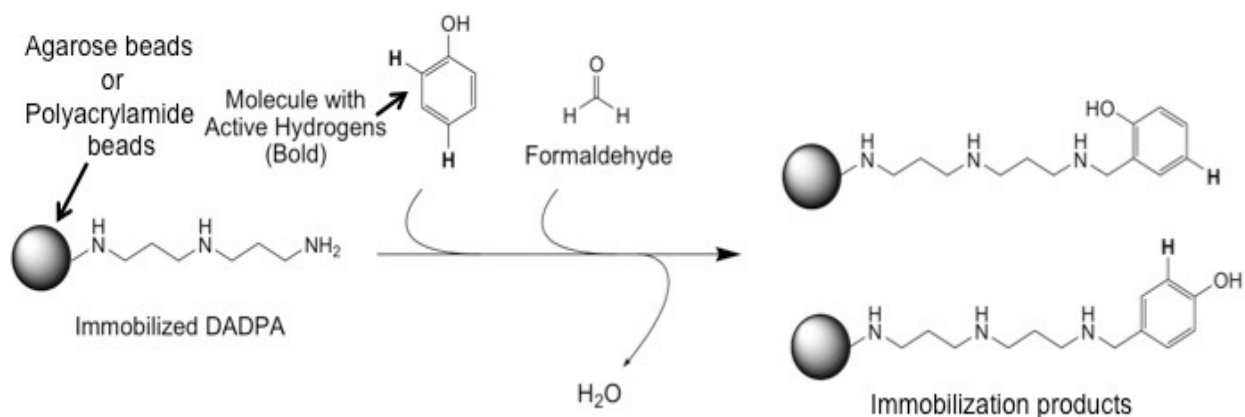

### B. FL118-protein interaction testing using NanoSep Omega Centrifugal Devices (PALL, Life Sciences)

| Proteins on 3K NanoSep Device | Tritium ( <sup>3</sup> H) CPM counts in retained parts |
|-------------------------------|--------------------------------------------------------|
| BSA                           | 3,877 ± 550                                            |
| Top1                          | 13,322 ± 1600                                          |
| DDX5                          | 123,763 ± 6800                                         |

**Fig. S2. A.** An example of the “Mannich Reaction”. **B.** The interaction of FL118 with bovine serum albumin (BSA), topoisomerase 1 (Top1) and DDX5. Counts per minute (CPM) is the mean ± SD derived from three-time independent testing. The detailed method is provided in the Section 4.6 (Determination of FL118-DDX5 and FL118-Top1 binding using Nanosep Device) in the paper.

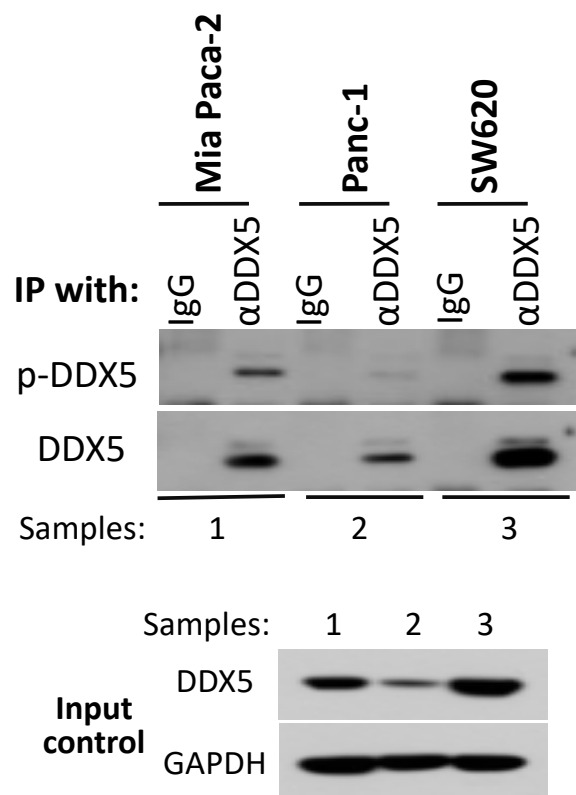

Pre-Experiment  
to test DDX5  
expression and  
DDX5 phosphorylation  
in three cancer cell lines  
by using IP and WB  
Before FL118 treatment

**Fig. S3.** Determination of DDX5 tyrosine (Tyr/Y) phosphorylation and expression in multiple CRC/PDAC cell lines. Sub-confluently growing Mia Paca-1, Panc-1 and SW620 cells without FL118 treatment were lysed and performed immunoprecipitation (IP) with anti-DDX5 antibody ( $\alpha$ DDX5), followed by Western blots using Tyr/Y-phospho-specific antibody and DDX5 antibody, respectively. The input control is the 10% of cell lysates before IP for Western blots with DDX5 and GAPDH antibodies. GAPDH is the internal control for total protein loading.

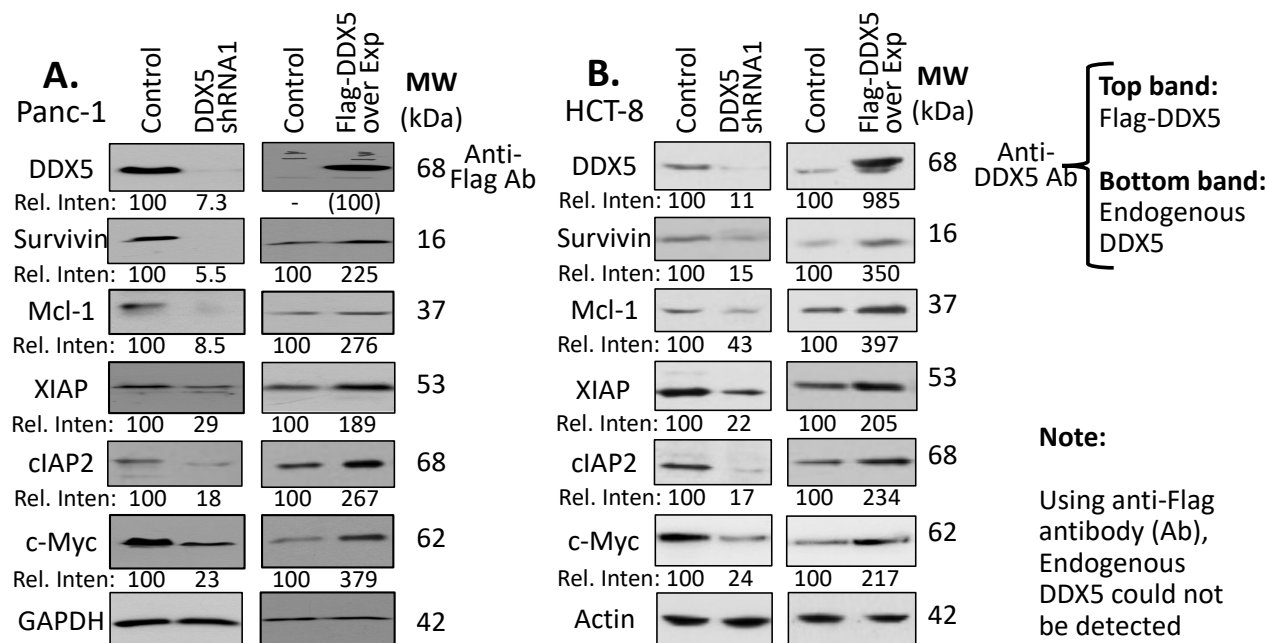

**Fig. S4. A., B.** (left panels): ShRNA silencing of DDX5 decreases the expression of survivin, Mcl-1, XIAP, cIAP2, and/or c-Myc in different degrees. Cells were infected with control or DDX5 shRNAs as shown. Infected cells were lysed 48h post infection; the cell lysates were used to determine the expression of DDX5, survivin, Mcl-1, XIAP, cIAP2, and/or c-Myc through Western blots. **A., B.** (right panels): Forced expression of flag-DDX5 increases the expression of survivin, Mcl-1 XIAP, cIAP2, and/or c-Myc in different degrees. Cells were transfected with empty vector (control) or flag-DDX5 expression vectors (RC200371, OriGene) using Lipofectamine 2000. Cells were lysed 48h post-transfection and subjected to Western blot analysis using their corresponding antibodies. Overexpressed flag-DDX5 was detected using flag antibody in (A); endogenous DDX5 could not be detected in this case (A, right panel). Overexpressed flag-DDX5 was detected using DDX5 antibody in (B); in this case, flag-DDX5 protein is slightly larger (B, right panel). Relative intensities (Rel. Inten) of the Western blot bends were marked out by setting the control band as 100 after normalized to the internal controls (GAPDH for A and Actin for B).

**DDX5 shRNA1** (V2LHS\_24065, location 172\_0624-E -11)

Hairpin sequence color codes - **mir-30 context** **sense** **loop** **antisense**

**5'-TGCTGTTGACAGTGAGCGCACACTTTCTTTACACCTAATA  
TAGTGAAGCCACAGATGTATATTAGGTGTAAAGAAAGTGT  
ATGCCTACTGCCTCGGA-3'**

**DDX5 shRNAs2** (V2LHS\_24063, location 172\_0574-G -12)

Hairpin sequence color codes - **mir-30 context** **sense** **loop** **antisense**

**5'-TGCTGTTGACAGTGAGCGACGTGACTGGGTTCTAAATGAA  
TAGTGAAGCCACAGATGTATTCATTAGAACCCAGTCACG  
CTGCCTACTGCCTCGGA-3'**

**Fig. S5.** DDX5-specific shRNA DNA sequences. Two DDX5-specific shRNA DNA sequences used in this study are shown.

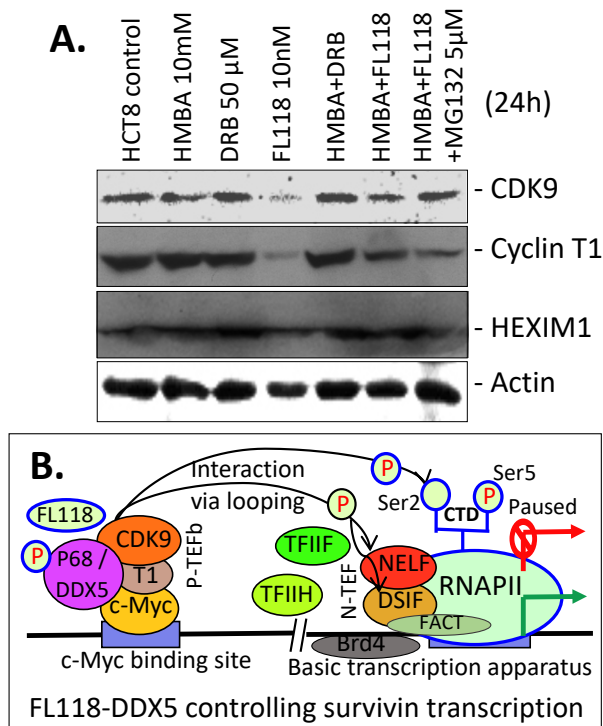

**Fig. S6. A.** FL118 inhibits the expression of CDK9 and T1: HCT8 CRC cells were treated with and without various reagents for 24h as shown, followed by WB analysis of the expression for CDK9 and T1. Actin is an internal control. Note: **HMBA** (hexamethylene bisacetamide), a P-TEFb activator; **DRB** (5,6-dichloro-1-b-D-ribofuranosyl-benzimidazole), a P-TEFb activity inhibitor. **B.** Preliminary working model for DDX5 to turn on survivin transcription: Constitutively activated DDX5 interacts with TF (c-Myc in this model) to recruit P-TEFb to form a complex on the survivin promoter, which activates CDK9 to interact with and phosphorylate relevant proteins to promote transcriptional elongation (**TE**) as shown by a green arrow (65). This includes phosphorylation of the CTD (C-terminal domain) of RNAPII at the Ser2 position and the **N-TEF** (negative transcription elongation factor), which consists of **NELF** (negative elongation factor) and **DSIF** (DRB-sensitivity inducing factor). This in turn triggers TFIIF and/or TFIIH to replace NELF as well as recruitment of **Brd4** (a bromodomain-containing protein involving in chromatin targeting) and **FAST** (facilitates chromatin transcription) (67, 81, 82). As a result, the RNAPII complex will transit its **paused state** into its **TE state** to promote survivin pre-mRNA transcription and maturation (66). However, inhibition of DDX5 by FL118 would disrupt this process.



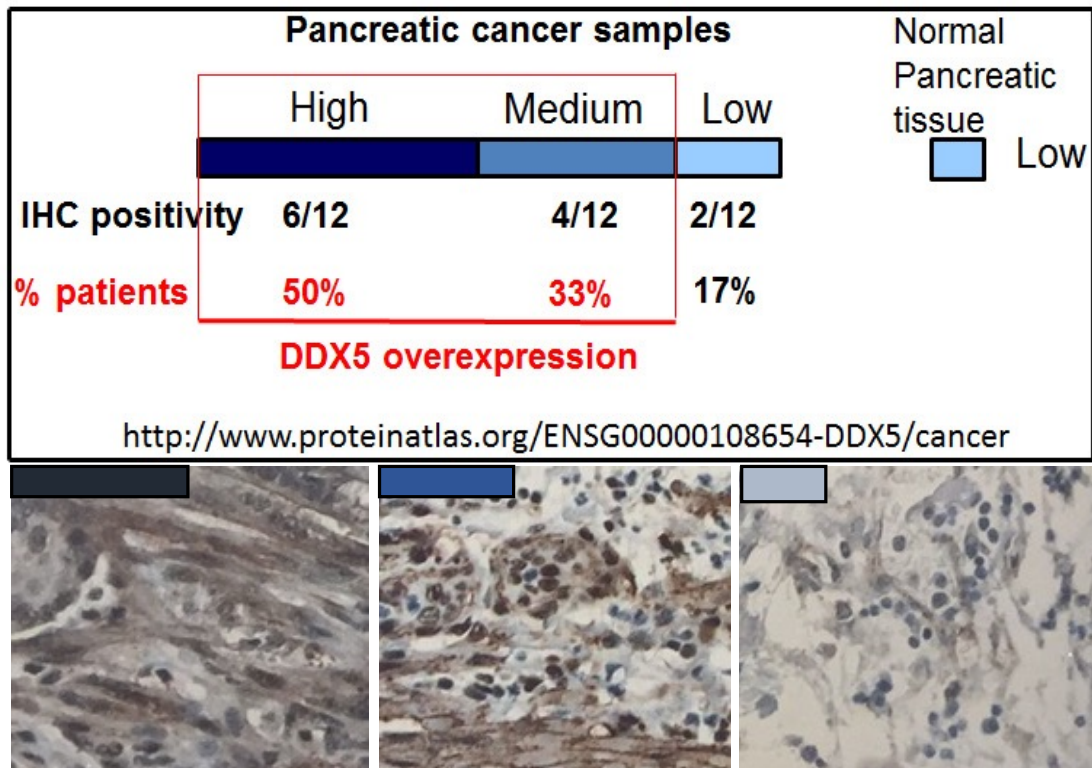

**Fig. S7** DDX5 expression is enhanced in PDAC tumor tissues: The Human Protein Atlas data indicate that DDX5 expression is enhanced in 83% of PDAC tumors.

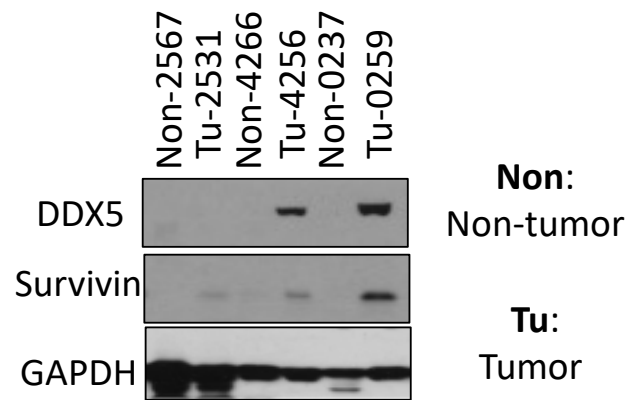

**Fig. S8** Western blots show DDX5 and survivin expression in 3 pairs of clinical CRC tumor specimens, GAPDH in is the internal control. As shown, high DDX5 is associated with high survivin.

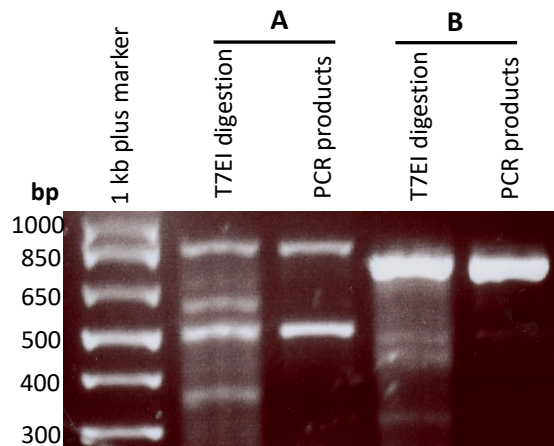

**Fig. S9.** Results from the detection of DDX5 KO cells in the KO cell pool. **A.** PCR products of primer pair A (Cas9\_DDX5\_AA\_AB-F and Cas9\_DDX5\_AA\_AB-R). **B:** PCR products of primer pair B (Cas9\_DDX5\_AA\_AC-F: 5' and Cas9\_DDX5\_AA\_AC-R). The principle of T7EI assay to determine whether there are DDX5 gene KO cells in the pool is that: Use PCR to amplify the targeted genomic region of the DDX5 gene modified region. Then, denature and reanneal PCR products in a thermal cycler to allow potential heteroduplex formation after the reannealing process between wild-type and CRISPR–mutated DNA. Then, digest reannealed PCR products with T7EI enzyme, which cleaves mismatched DNA heteroduplexes. If there are heteroduplex formation (i.e., existence of DDX5 KO cells), after digestion, other small DNA bands would be detected. Otherwise, if no KO cell exists, T7EI enzyme-digested and undigested PCR products will be the same results of no changes for the DNA band pattern shown on the gel after electrophoresis.

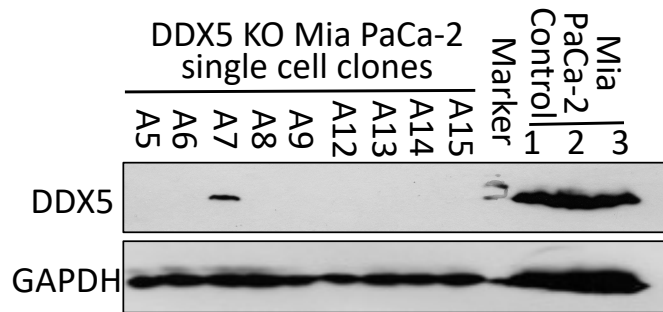

**Fig. S10.** Detection of DDX5 expression in the Mia PaCa-2 single cell clones with DDX5 knockout (KO) generated by using the vector-free CRISPR technology. The expression profile of DDX5 in various Mia PaCa-2 individual cell clones in parallel with the non-DDX5 KO control Mia PaCa-2 cells analyzed by using Western blots is shown. GAPDH is the internal control.

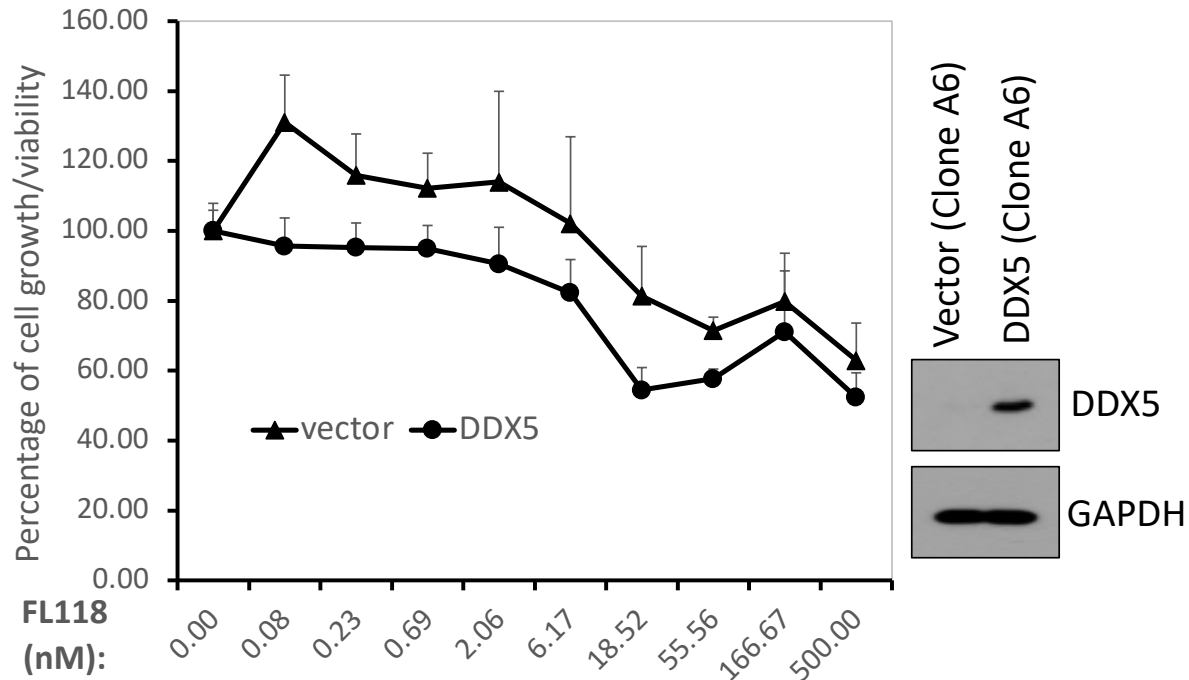

**Fig. S11.** Determination of the Mia Paca-2 DDX5 KO A6 clone cells' sensitivity to FL118 treatment with and without re-expression of DDX5. After transfection of control vector (pCMV6-Entry) and DDX5 expression vector (pCMV6-Entry-DDX5) into Mia Paca-2 DDX5 KO A6 clone cells with a limited kanamycin selection. A part of the DDX5 KO A6 clone transfectant cells were analyzed for DDX5 re-expression using Western blots (the result in right panel). GAPDH is the internal control. Another part of the DDX5 KO A6 clone transfectant cells were seeded in 96-well plated overnight and then treated on the following day with a series of FL118 concentration as shown for 72h. Cell viability/growth were then analyzed using MTT assay. Each curve is the mean + SD derived from 3 independent tests (the result in left panel).

**Table S1. Results of <sup>3</sup>H-FL118-DEAD box protein binding**

| Database ID | Ultimate ORF ID | Description [Use of tritium ( <sup>3</sup> H)-labeled FL118 as a probe] | Negative Z-Score* | FL118 Z-Score* |
|-------------|-----------------|-------------------------------------------------------------------------|-------------------|----------------|
| NM_004939.1 | IOH14578        | DEAD (Asp-Glu-Ala-Asp) box polypeptide 1 (DDX1)                         | 0.72833           | 0.17385        |
| BC047455.1  | IOH26531        | DEAD (Asp-Glu-Ala-Asp) box polypeptide 4 (DDX4)                         | 0.29952           | 0.02775        |
| BC039826.1  | IOH26225        | DEAD (Asp-Glu-Ala-Asp) box polypeptide 6 (DDX6)                         | 0.78491           | -0.53613       |
| NM_004397.3 | IOH45655        | Probable ATP-dependent RNA helicase DDX6                                | -4.22936          | -0.3412        |
| NM_004398.2 | IOH38427        | DEAD (Asp-Glu-Ala-Asp) box polypeptide 10 (DDX10)                       | 0.25449           | -0.01765       |
| BC050522.1  | IOH26996        | DEAD/H (Asp-Glu-Ala-Asp/His) box polypeptide 11 (DDX11)                 | -1.95948          | 0.06313        |
| NM_030881.2 | IOH1750         | DEAD (Asp-Glu-Ala-Asp) box polypeptide 17 (DDX17)                       | 0.42192           | 0.20888        |
| BC003360.1  | IOH2892         | DEAD (Asp-Glu-Ala-Asp) box polypeptide 18 (DDX18)                       | 0.02568           | 1.41679        |
| NM_007242.3 | IOH3925         | DEAD (Asp-Glu-Ala-As) box polypeptide 19B (DDX19B)                      | 0.03888           | -0.15213       |
| BC031062.1  | IOH27218        | DEAD (Asp-Glu-Ala-Asp) box polypeptide 20 (DDX20)                       | 0.06196           | -0.10666       |
| BC011556.1  | IOH13000        | DEAD (Asp-Glu-Ala-Asp) box polypeptide 20 (DDX20)                       | -0.08376          | 0.76704        |
| NM_004728.2 | IOH46173        | DEAD (Asp-Glu-Ala-Asp) box polypeptide 21 (DDX21)                       | 0.80949           | -0.76238       |
| NM_013264.2 | IOH45462        | DEAD (Asp-Glu-Ala-Asp) box polypeptide 25 (DDX25)                       | -0.20313          | 0.89783        |
| NM_005804.2 | IOH3477         | DEAD (Asp-Glu-Ala-Asp) box polypeptide 39 (DDX39)                       | 0.64786           | 1.03613        |
| NM_138998.1 | IOH21408        | DEAD (Asp-Glu-Ala-Asp) box polypeptide 39 (DDX39)                       | 0.38945           | -0.43721       |
| BC015505.1  | IOH9981         | DEAD (Asp-Glu-Ala-Asp) box polypeptide 42 (DDX42)                       | 0.23496           | -0.32012       |
| BC066938.1  | IOH40083        | DEAD (Asp-Glu-Ala-Asp) box polypeptide 43 (DDX43)                       | -1.41173          | -0.03906       |
| NM_016355.3 | IOH39973        | DEAD (Asp-Glu-Ala-Asp) box polypeptide 47 (DDX47)                       | -0.04594          | -2.638         |
| BC000979.2  | IOH2932         | Probable ATP-dependent RNA helicase DDX49                               | -0.71964          | -0.09828       |
| NM_019070.1 | IOH5264         | DEAD (Asp-Glu-Ala-Asp) box polypeptide 49 (DDX49)                       | -0.85024          | 1.28934        |
| BC001132.1  | IOH3853         | DEAD (Asp-Glu-Ala-Asp) box polypeptide 54 (DDX54)                       | 0.74757           | 1.18306        |
| BC030020.2  | IOH22410        | DEAD (Asp-Glu-Ala-Asp) box polypeptide 55 (DDX55)                       | 0.74673           | 0.66028        |
| BC035911.1  | IOH25946        | DEAD (Asp-Glu-Ala-Asp) box polypeptide 55 (DDX55)                       | 0.73311           | 0.49841        |
| NM_014314.3 | IOH52971        | Probable ATP-dependent RNA helicase DDX58                               | -0.0081           | 0.28653        |
| NM_004396.5 | IOH1655         | DEAD/H (Asp-Glu-Ala-Asp/His) box polypeptide 5 (DDX5)                   | 0.27649           | 8.30128        |
| NM_002046.2 | IOH3380         | glyceraldehyde-3-phosphate dehydrogenase (GAPDH)                        | -0.20833          | -0.3624        |
| NM_003536.2 | IOH6208         | Histone H3                                                              | -0.22304          | -1.16182       |

\*Z-score is a protein-binding tritium (<sup>3</sup>H) signal subtracted from the mean signal from all the human proteins tested on the protein microarray, then divided by the standard deviation (**SD**) of all proteins. A Z-Score greater than 2.0 means a signal greater than 2x SD above the median signal from all the human proteins tested on the ProtoArray. Negative Z-score is <1. **Note:** DDX5 is Flag-tagged, and all other proteins on the microarray are GST-tagged.

**Table S2. Use of centrifugation to determine the minimal DMSP concentration that does not induce FL118 precipitation at 100  $\mu$ M**

| Sample # (FL118)       | DMSO %    | Sample     | Spin for 1 min        | DPM/CPM      |
|------------------------|-----------|------------|-----------------------|--------------|
| 1 (FL118 100 $\mu$ M)  | 5%, 1-1   | 20 $\mu$ l | Pre-Spin              | 101893/29099 |
| 2 (FL118 100 $\mu$ M)  | 5%, 2-2   | 20 $\mu$ l | After Spin at 3k rpm  | 93968/26440  |
| 3 (FL118 100 $\mu$ M)  | 5%, 3-3   | 20 $\mu$ l | After Spin at 12k rpm | 89487/25386  |
|                        |           |            |                       |              |
| 4 (FL118 100 $\mu$ M)  | 8%, 4-1   | 20 $\mu$ l | Pre-Spin              | 101673/28696 |
| 5 (FL118 100 $\mu$ M)  | 8%, 5-2   | 20 $\mu$ l | After Spin at 3k rpm  | 99447/28481  |
| 6 (FL118 100 $\mu$ M)  | 8%, 6-3   | 20 $\mu$ l | After Spin at 12k rpm | 104522/29542 |
|                        |           |            |                       |              |
| 7 (FL118 100 $\mu$ M)  | 10%, 7-1  | 20 $\mu$ l | Pre-Spin              | 107627/30810 |
| 8 (FL118 100 $\mu$ M)  | 10%, 8-2  | 20 $\mu$ l | After Spin at 3k rpm  | 104440/29105 |
| 9 (FL118 100 $\mu$ M)  | 10%, 9-3  | 20 $\mu$ l | After Spin at 12k rpm | 105432/30273 |
|                        |           |            |                       |              |
| 10 (FL118 100 $\mu$ M) | 16%, 10-1 | 20 $\mu$ l | Pre-Spin              | 111074/31108 |
| 11 (FL118 100 $\mu$ M) | 16%, 11-2 | 20 $\mu$ l | After Spin at 3k rpm  | 109799/30973 |
| 12 (FL118 100 $\mu$ M) | 16%, 12-3 | 20 $\mu$ l | After Spin at 12k rpm | 110081/30902 |
|                        |           |            |                       |              |
| 13 (FL118 100 $\mu$ M) | 20%, 13-1 | 20 $\mu$ l | Pre-Spin              | 101766/29215 |
| 14 (FL118 100 $\mu$ M) | 20%, 14-2 | 20 $\mu$ l | After Spin at 3k rpm  | 105522/29997 |
| 15 (FL118 100 $\mu$ M) | 20%, 15-3 | 20 $\mu$ l | After Spin at 12k rpm | 105776/30137 |
|                        |           |            |                       |              |
| 16 (FL118 100 $\mu$ M) | 25%, 16-1 | 20 $\mu$ l | Pre-Spin              | 134269/38410 |
| 17 (FL118 100 $\mu$ M) | 25%, 17-2 | 20 $\mu$ l | After Spin at 3k rpm  | 138718/39547 |
| 18 (FL118 100 $\mu$ M) | 25%, 18-3 | 20 $\mu$ l | After Spin at 12k rpm | 139932/40121 |
|                        |           |            |                       |              |
| 19 (FL118 100 $\mu$ M) | 40%, 19-1 | 20 $\mu$ l | Pre-Spin              | 138588/39897 |
| 20 (FL118 100 $\mu$ M) | 40%, 20-2 | 20 $\mu$ l | After Spin at 3k rpm  | 130401/37725 |
| 21 (FL118 100 $\mu$ M) | 40%, 21-3 | 20 $\mu$ l | After Spin at 12k rpm | 144315/42167 |

**Conclusions from the result shown in Table S2:** This centrifugation testing found that 5% DMSO is not good enough, but 8% DMSO is good enough to maintain FL118 at 100  $\mu$ M concentration in 1xPBS without precipitation (i.e., a true solution without FL118 precipitation at 8% DMSO). Of note, the DMSO at  $\leq 10\%$  in the protein-small molecule solution for isothermal titration calorimetry (ITC) determination of the small molecule binding affinity to the protein is the best. DMSO  $> 10\%$  will be a sub-optimal concentration for ITC studies of drug-protein interaction affinity.
